# Supplementary material for: Loss of Ptpmt1 limits mitochondrial utilization of carbohydrates and leads to muscle atrophy and heart failure in tissue-specific knockout mice
Source: eLife journal article supplement (doi:10.7554/elife.86944), 2023-06-07

Whole blots of Figure 2

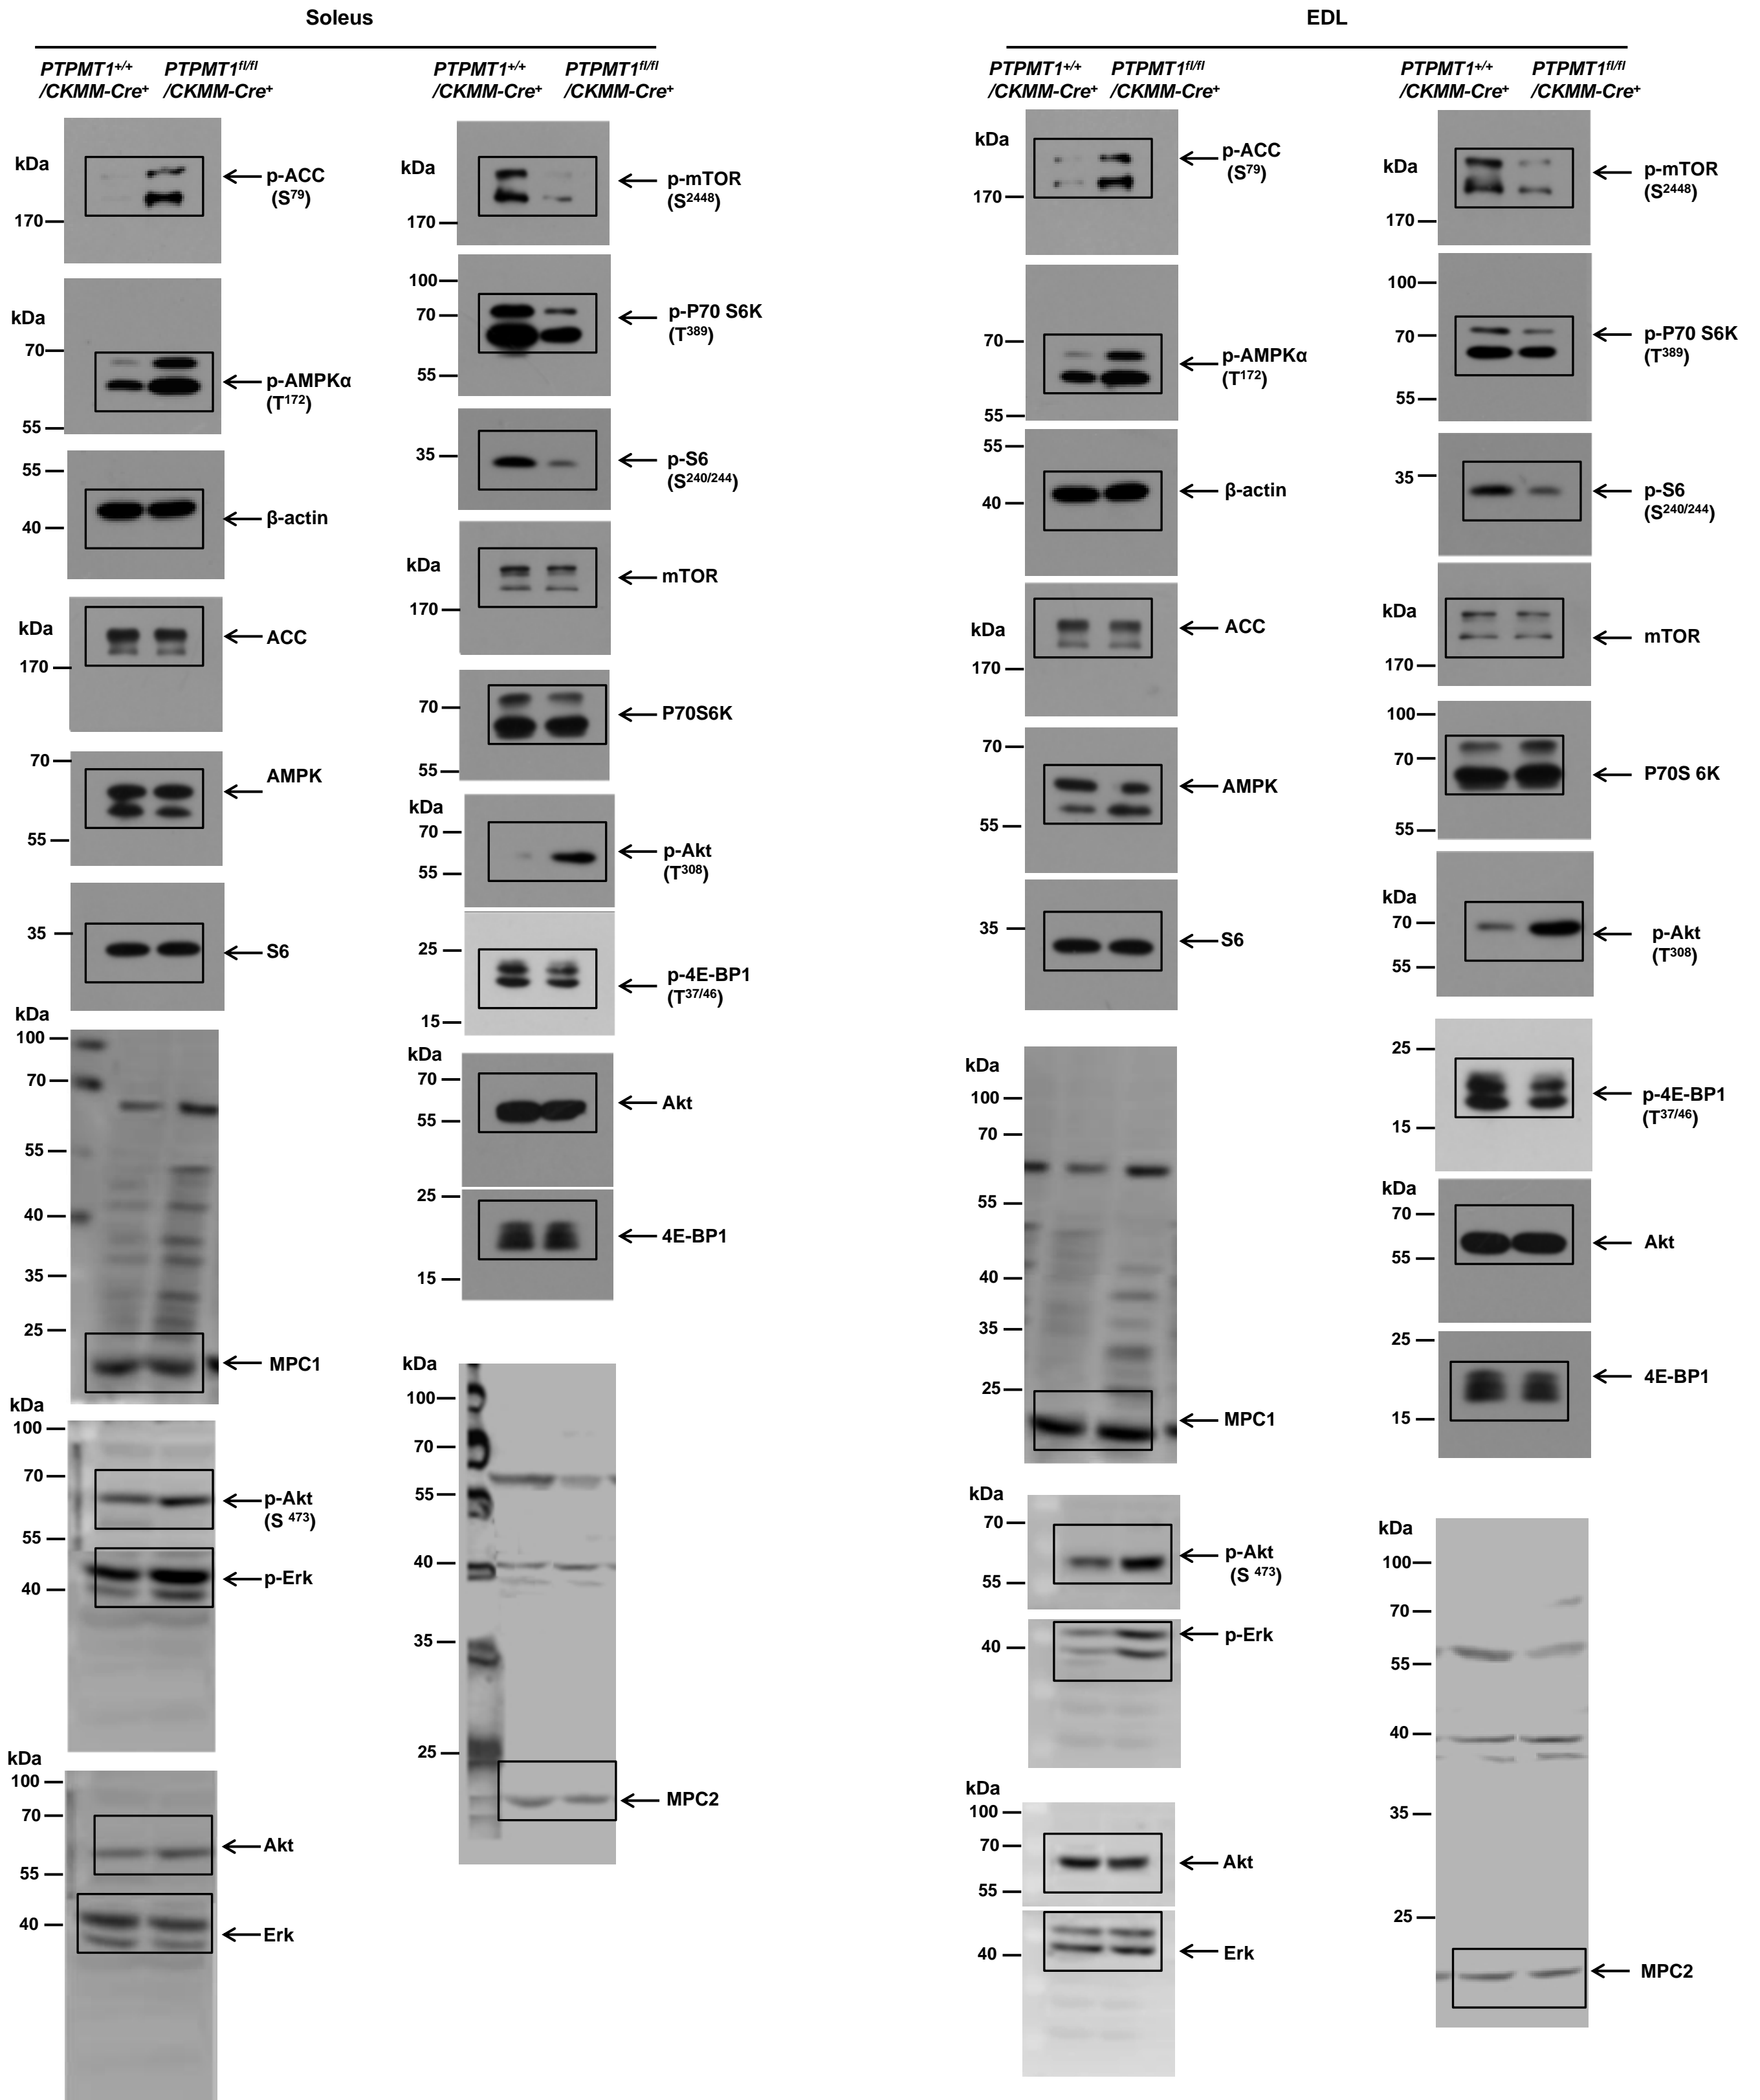

Supplement: fig2-data1 [file elife-86944-fig2-data1-v1.pdf]
